# Supplementary material for: Tuberculin skin test conversion and primary progressive tuberculosis disease in the first 5 years of life: a birth cohort study from Cape Town, South Africa
Source: PubMed Central journal article supplement (PMC5810304; doi:10.1016/s2352-4642(17)30149-9), 2018-01
Supplement: mmc1.pdf [file mmc1.pdf]

# THE LANCET

## Child & Adolescent Health

### Supplementary appendix

This appendix formed part of the original submission and has been peer reviewed.  
We post it as supplied by the authors.

Supplement to: Martinez L, le Roux DM, Barnett W, Stadler A, Nicol MP, Zar HJ.  
Tuberculin skin test conversion and primary progressive tuberculosis disease  
in the first 5 years of life: a birth cohort study from Cape Town, South Africa.  
*Lancet Child Adolesc Health* 2017; published online Nov 17. [http://dx.doi.org/10.1016/S2352-4642\(17\)30149-9](http://dx.doi.org/10.1016/S2352-4642(17)30149-9).

## **SUPPLEMENTARY APPENDIX.**

Tuberculin Skin Test Conversion and  
Primary Progressive Tuberculosis Disease in the First Five Years of Life:  
A Birth Cohort Study from Cape Town, South Africa

Leonardo Martinez<sup>1,2</sup>, David M. Le Roux<sup>3</sup>, Whitney Barnett<sup>3</sup>,  
Attie Stadler<sup>3</sup>, Mark P. Nicol<sup>4</sup>, Heather J. Zar<sup>3</sup>

<sup>1</sup> Stanford University, School of Medicine, Division of Infectious Diseases and Geographic Medicine, Stanford, California, United States;

<sup>2</sup>Department of Epidemiology and Biostatistics, College of Public Health, University of Georgia, Athens, Georgia, United States;

<sup>3</sup>Department of Paediatrics and Child Health, Red Cross War Memorial Children's Hospital and MRC Unit on Child and Adolescent Health, University of Cape Town, Cape Town, South Africa;

<sup>4</sup>Division of Medical Microbiology, University of Cape Town, Cape Town, South Africa

## TABLE OF CONTENTS.

### 1. ADDITIONAL METHODOLOGICAL INFORMATION.

#### 2. SUPPLEMENTARY TABLES.

Supplementary Table 1. Comparison of infant, maternal, and household characteristics of enrolled participants included and not included in the main analysis (N=1143).

Supplementary Table 2. Relationship between a lower respiratory tract infection and tuberculosis disease expressed by hazard ratios and 95% confidence intervals, stratified by the method of tuberculosis diagnosis of the infant.

Supplementary Table 3. Cumulative hazard rate for tuberculin skin test conversion, all diagnosed tuberculosis, microbiologically-confirmed or radiographically diagnosed tuberculosis, and microbiologically-confirmed tuberculosis stratified by infant age.

Supplementary Table 4. Age at tuberculin skin test administration and the size of the skin test induration

Supplementary Table 5. Tuberculosis-related outcomes in children and maternal smoking during pregnancy, restricted to the TC Newman site.

Supplementary Table 6. Test of proportional hazards assumption for variables included in Cox Models of outcomes of tuberculin skin test conversion and diagnosed tuberculosis.

Supplementary Table 7. Clinical and maternal characteristics children with HIV-infection and diagnosed with tuberculosis meningitis included in the study.

#### 3. SUPPLEMENTARY FIGURES.

Supplementary Figure 1. Distribution of tuberculin skin test induration reactions from the first test taken from 915 children in the Drakenstein Child Health Study.

Supplementary Figure 2. Cumulative hazards curves for (A) tuberculin skin test conversion, (B) diagnosed tuberculosis disease, (C), microbiologically or radiographically diagnosed tuberculosis, and (D) microbiologically-confirmed tuberculosis only, Drakenstein Birth Cohort Study.

Supplementary Figure 3. Difference in days between lower respiratory tract infection and tuberculosis diagnoses among all pediatric tuberculosis cases

Supplementary Figure 4. Difference in days<sup>†</sup> between lower respiratory tract infection and tuberculosis diagnoses in pediatric tuberculosis cases diagnosed microbiologically-confirmed

Supplementary Figure 5. Difference in days<sup>†</sup> between lower respiratory tract infection and tuberculosis diagnoses in pediatric tuberculosis cases diagnosed either radiographically or microbiologically.

Supplementary Figure 6. Difference in days<sup>†</sup> between lower respiratory tract infection and tuberculosis diagnoses in all diagnosed tuberculosis cases

## **ADDITIONAL METHODOLOGICAL INFORMATION.**

### **Nutritional status.**

We derived Z-scores from World Health Organization child growth standards at birth and at every follow-up visit; we used the median of all the weight-for-age Z scores for each child to summarize nutrition status over the duration of follow-up. Children were considered severely underweight or stunted if weight-for-age and length-for-age Z scores were less than  $-2$ .

### **Diagnosis of Lower Respiratory Tract Infections.**

An active surveillance system was established to detect participants with lower respiratory tract infections or severe lower respiratory tract infections. Study staff undertook surveillance for lower respiratory tract infections at primary care clinics and at Paarl Hospital on weekdays during working hours (0800–1600 h); surveillance continued at Paarl Hospital after hours and over weekends when clinics were closed. If a participant attended a primary health-care clinic or the emergency unit at Paarl Hospital, the healthcare provider could contact the study nurse on the 24-hour mobile phone number. Mothers were given the mobile phone number to enable them to contact the study nurse on call if their child became ill. The study doctor provided regular training for all primary health-care nurses in the accurate assessment of symptoms and signs in young children, and to ensure birth cohort participants were referred to the research study site when lower respiratory tract infections or severe lower respiratory tract infections were diagnosed. Study nurses had regular competency assessments. As the mothers were interviewed frequently through their child's first year of life, and study staff always enquired about previous respiratory events, it was possible to retrospectively capture lower respiratory tract infection events occurring at other facilities or outside the area; information was obtained by review of medical records at the admitting facility.

Specifically, lower respiratory tract infections were diagnosed in children with cough or difficulty breathing and age-specific tachypnea ( $\geq 50$  breaths per min for children aged 2–12 months) or if the child had lower chest wall indrawing. The treating doctor made the decision to admit a child to hospital; indications included severe lower respiratory tract infections, hypoxia (oxygen saturation of  $\leq 92\%$  in room air), or poor social circumstances in which ambulatory treatment was not feasible. Severe lower respiratory tract infections were diagnosed in children younger than 2 months with tachypnoea ( $> 60$  breaths per min) or lower chest wall indrawing, or in children of any age if the child had a general danger sign. Admission of the infant to the hospital was made by the attending clinician and indications for hospital admission included severe lower respiratory tract infections, hypoxia, or infeasibility of ambulatory treatment.

**Supplementary Table 1. Comparison of infant, maternal, and household characteristics of enrolled participants included and not included in the main analysis (N=1143).**

| <b>Variable</b>                       | <b>Participants included in main analysis<br/>[n (%)]*</b> | <b>Participants not included in main analysis<br/>[n (%)]*</b> | <b>All Enrolled Participants<br/>[n (%)]</b> | <b>P Value†</b> |
|---------------------------------------|------------------------------------------------------------|----------------------------------------------------------------|----------------------------------------------|-----------------|
| <b>Infant characteristics</b>         |                                                            |                                                                |                                              |                 |
| N                                     | 915 (80.1)                                                 | 228 (20.0)                                                     | 1143 (100)                                   | -               |
| Male                                  | 468 (51.2)                                                 | 121 (53.3)                                                     | 589 (51.6)                                   | 0.561           |
| Median birthweight, kilograms (IQR)   | 3.1 (2.7, 3.4)                                             | 3.1 (2.7, 3.4)                                                 | 3.1 (2.7, 3.4)                               | 0.756           |
| Low birthweight, <2.5 kilograms       | 135 (14.8)                                                 | 39 (17.2)                                                      | 174 (15.2)                                   | 0.363           |
| Median gestational age, weeks (IQR)   | 39 (38, 40)                                                | 39 (37, 40)                                                    | 39 (37, 40)                                  | 0.222           |
| Preterm birth, <37 weeks              | 147 (16.1)                                                 | 43 (19.2)                                                      | 190 (16.7)                                   | 0.260           |
| Clinic                                |                                                            |                                                                |                                              | 0.115           |
| Mbekweni                              | 495 (54.1)                                                 | 137 (60.0)                                                     | 632 (55.3)                                   |                 |
| TC Newman                             | 420 (45.9)                                                 | 91 (40.0)                                                      | 511 (44.8)                                   |                 |
| Lower Respiratory Tract Infection     | 440 (48.1)                                                 | 24 (10.5)                                                      | 464 (40.6)                                   | <0.01           |
| HIV-exposed                           | 201 (22.0)                                                 | 48 (21.2)                                                      | 249 (21.8)                                   | 0.788           |
| HIV-positive                          | 2 (0.2)                                                    | 0 (0)                                                          | 2 (0.2)                                      | 0.481           |
| Median weight for age z-score (IQR)   | -0.54 (-1.95, 0.10)                                        | -0.55 (-1.26, -0.02)                                           | -0.55 (-1.31, 0.07)                          | 0.500           |
| Weight for age z-score‡               |                                                            |                                                                |                                              | 0.452           |
| Underweight, <-2                      | 84 (9.2)                                                   | 16 (7.2)                                                       | 100 (8.8)                                    |                 |
| Normal weight, between -2 and 2       | 812 (89.1)                                                 | 203 (91.9)                                                     | 1015 (89.7)                                  |                 |
| Overweight, >2                        | 15 (1.7)                                                   | 2 (0.9)                                                        | 17 (1.5)                                     |                 |
| Received Isoniazid Preventive Therapy | 61 (6.7)                                                   | 14 (6.2)                                                       | 75 (6.6)                                     | 0.810           |
| <b>Maternal characteristics</b>       |                                                            |                                                                |                                              |                 |
| Median age, years (IQR)               | 26.3 (22.1, 31.0)                                          | 24.3 (21.5, 28.4)                                              | 25.8 (22.0, 30.8)                            | 0.002           |
| Married or cohabitating               | 366 (40.0)                                                 | 94 (41.6)                                                      | 460 (40.3)                                   | 0.662           |
| TB treatment during pregnancy         | 41 (4.5)                                                   | 7 (3.1)                                                        | 48 (4.2)                                     | 0.460           |
| Ever diagnosed with tuberculosis¥     | 38 (4.2)                                                   | 3 (1.3)                                                        | 41 (3.6)                                     | 0.044           |
| Current smoker††                      | 218 (24.0)                                                 | 44 (19.6)                                                      | 262 (23.1)                                   | 0.161           |
| Maternal education                    |                                                            |                                                                |                                              | 0.023           |
| Primary school only                   | 73 (8.0)                                                   | 13 (5.7)                                                       | 86 (7.5)                                     |                 |
| Some secondary school                 | 500 (54.6)                                                 | 107 (47.1)                                                     | 607 (53.2)                                   |                 |
| Finished secondary school             | 342 (37.4)                                                 | 107 (47.1)                                                     | 449 (39.3)                                   |                 |
| Formal employment                     | 243 (26.6)                                                 | 65 (28.6)                                                      | 308 (27.0)                                   | 0.528           |
| <b>Household Characteristics</b>      |                                                            |                                                                |                                              |                 |
| Socioeconomic status, quartile        |                                                            |                                                                |                                              | 0.004           |
| Lowest                                | 233 (25.7)                                                 | 43 (19.1)                                                      | 276 (24.4)                                   |                 |
| Moderate low                          | 242 (26.7)                                                 | 47 (20.9)                                                      | 289 (25.5)                                   |                 |
| Moderate high                         | 226 (24.9)                                                 | 61 (27.1)                                                      | 287 (25.4)                                   |                 |
| Highest                               | 206 (22.7)                                                 | 74 (32.9)                                                      | 280 (24.7)                                   |                 |
| Household income, rand per month      |                                                            |                                                                |                                              | 0.04            |

|                                      |            |            |            |       |
|--------------------------------------|------------|------------|------------|-------|
| <1000                                | 359 (39.2) | 71 (31.3)  | 430 (37.7) |       |
| 1000–5000                            | 442 (48.3) | 117 (51.5) | 559 (49.0) |       |
| >5000                                | 114 (12.5) | 38 (17.2)  | 153 (13.4) |       |
| Informal housing                     | 326 (35.6) | 97 (42.7)  | 423 (37.0) | 0.05  |
| Crowding, persons/household (IQR)    | 4 (3, 6)   | 4 (3, 6)   | 4 (3, 6)   | 0.073 |
| Crowding, persons/household          |            |            |            | 0.310 |
| 3 or fewer                           | 297 (32.5) | 86 (37.9)  | 383 (33.6) |       |
| 4 or 5                               | 313 (34.3) | 72 (31.7)  | 385 (33.8) |       |
| More than 5                          | 303 (33.2) | 69 (30.4)  | 372 (32.6) |       |
| Infants <5 years of age/household    |            |            |            | 0.593 |
| None                                 | 563 (61.5) | 147 (64.8) | 710 (62.2) |       |
| One                                  | 291 (31.8) | 68 (30.0)  | 359 (31.4) |       |
| More than one                        | 61 (6.7)   | 12 (5.3)   | 73 (6.4)   |       |
| TB patient in household in past year | 128 (14.1) | 30 (13.4)  | 158 (14.0) | 0.781 |

Abbreviations: TB, tuberculosis. IQR, interquartile range. HIV, Human immunodeficiency virus.

† We used Pearson chi-square and Fisher exact tests as appropriate to derive P values for categorical variables. For continuous variables, we used Wilcoxon rank sum tests for comparison of two-sample medians.

\*Percentages refer to within-characteristic column totals among participants within each clinic and in entire study. Percentages may not total 100% because within-column percentages were rounded to the nearest integer.

‡ We derived Z scores from World Health Organization child growth standards at birth and at every follow-up visit; we used the median of all the weight-for-age Z scores for each child to summarize nutrition status over the duration of follow-up.

¥ This row represents mother that were ever diagnosed with tuberculosis prior to pregnancy.

†† This refers to self-reported smoking status. This was highly correlated with maternal cotinine levels.

**Supplementary Table 2. Relationship between a lower respiratory tract infection and tuberculosis disease expressed by hazard ratios† and 95% confidence intervals, stratified by the method of tuberculosis diagnosis of the infant.**

| Variable              | All diagnosed tuberculosis disease | Microbiologically-confirmed or radiographically-suggestive tuberculosis | Microbiologically-confirmed tuberculosis |
|-----------------------|------------------------------------|-------------------------------------------------------------------------|------------------------------------------|
| Any LRTI              | 2.13 (1.36, 3.32), 0.001           | 2.83 (1.52, 5.28), 0.001                                                | 9.72 (2.24, 42.08), 0.002                |
| Number of LRTI events |                                    |                                                                         |                                          |
| 0                     | 1 (Referent)                       | 1 (Referent)                                                            | 1 (Referent)                             |
| 1                     | 1.85 (1.13, 3.00), 0.014           | 2.29 (1.16, 4.54), 0.017                                                | 7.19 (1.55, 33.30), 0.012                |
| 2                     | 2.28 (1.11, 4.66), 0.025           | 3.21 (1.29, 7.97), 0.012                                                | 8.94 (1.49, 53.69), 0.017                |
| 3                     | 4.05 (1.68, 9.74), 0.002           | 4.80 (1.37, 16.74), 0.014                                               | 22.50 (3.16, 160.34), 0.002              |
| 4                     | 3.35 (0.80, 14.04), 0.098          | 6.61 (1.50, 29.17), 0.013                                               | 39.98 (5.60, 285.55), <0.01              |
| 5                     | 9.29 (2.20, 39.19), 0.002          | 28.22 (6.23, 127.71), <0.01                                             | 117.45 (9.93, 1389.52), <0.01            |
| 6                     | UNDEFINED                          | UNDEFINED                                                               | UNDEFINED                                |
| 7                     | UNDEFINED                          | UNDEFINED                                                               | UNDEFINED                                |
| LRTI severity         |                                    |                                                                         |                                          |
| None                  | 1 (Referent)                       | 1 (Referent)                                                            | 1 (Referent)                             |
| Non-severe            | 2.21 (1.40 – 3.51), 0.001          | 2.94 (1.55 – 5.59), 0.001                                               | 10.90 (2.49 – 47.68), 0.002              |
| Severe                | 1.77 (0.84 – 3.74), 0.132          | 2.41 (0.93 – 6.28), 0.072                                               | 5.36 (0.75 – 38.12), 0.093               |
| LRTI care             |                                    |                                                                         |                                          |
| None                  | 1 (Referent)                       | 1 (Referent)                                                            | 1 (Referent)                             |
| Ambulatory            | 1.90 (1.18 – 3.06), 0.008          | 2.42 (1.24 – 4.70), 0.009                                               | 8.65 (1.93 – 38.35), 0.005               |
| Hospitalized          | 3.00 (1.63 – 5.50), <0.01          | 4.40 (2.00 – 9.70), <0.01                                               | 13.82 (2.68 – 71.24), 0.002              |

Abbreviations. LRTI, lower respiratory tract infection.

†We adjusted all models for the site of enrollment.

**Supplementary Table 3. Cumulative hazard rate for tuberculin skin test conversion<sup>‡</sup>, all diagnosed tuberculosis<sup>¥</sup>, microbiologically-confirmed or radiographically diagnosed tuberculosis<sup>†</sup>, and microbiologically-confirmed tuberculosis<sup>‡</sup> stratified by infant age.**

| Infant age               | Tuberculin skin conversion (95% CI) | All diagnosed tuberculosis disease (95% CI) | Microbiologically-confirmed or radiographically diagnosed tuberculosis (95% CI) | Microbiologically-confirmed tuberculosis (95% CI) |
|--------------------------|-------------------------------------|---------------------------------------------|---------------------------------------------------------------------------------|---------------------------------------------------|
| <b>Cumulative Hazard</b> |                                     |                                             |                                                                                 |                                                   |
| 6 months                 | 8.2 (6.4, 10.4)                     | 2.53 (1.68, 3.81)                           | 0.99 (0.51, 1.90)                                                               | 0.66 (0.30, 1.46)                                 |
| 12 months                | 16.5 (13.7, 19.9)                   | 6.16 (4.73, 8.02)                           | 2.81 (1.90, 4.15)                                                               | 1.57 (0.93, 2.65)                                 |
| 24 months                | 21.6 (18.0, 26.0)                   | 8.40 (6.69, 10.55)                          | 4.46 (3.26, 6.11)                                                               | 1.80 (1.10, 2.94)                                 |
| 36 months                | 36.5 (28.9, 46.2)                   | 10.09 (8.12, 12.54)                         | 5.56 (4.15, 7.44)                                                               | 2.27 (1.44, 3.58)                                 |
| 48 months                | –                                   | 10.35 (8.33, 12.87)                         | 6.13 (4.56, 8.24)                                                               | 2.27 (1.44, 3.58)                                 |
| 60 months                | –                                   | 10.35 (8.33, 12.87)                         | 6.13 (4.56, 8.24)                                                               | 2.27 (1.44, 3.58)                                 |
| All ages, rate per year  | 11.8 (10.0, 13.8)                   | 2.94 (2.38, 3.68)                           | 1.64 (1.23, 2.20)                                                               | 0.66 (0.41, 1.04)                                 |

<sup>‡</sup>Tuberculin conversion was defined as an induration reaction of greater than or equal to 10-millimeters – children with a reactive skin test <10 millimeters were not given another test at routine visits and were censored. Overall, 147 children tuberculin converted their skin test.

<sup>¥</sup> Diagnosed tuberculosis included any type of diagnosis (clinical, radiographical, microbiological). Overall, 81 children had diagnosed tuberculosis.

<sup>†</sup>Microbiologically-confirmed or radiographically diagnosed tuberculosis included participants with any diagnosis from either a positive microbiological or radiographical test. Overall, 45 children had Microbiologically or radiographically diagnosed tuberculosis.

<sup>‡</sup>Microbiologically confirmed tuberculosis included participants with a positive Xpert MTB/RIF, sputum culture, or sputum smear test result. Overall, 18 children had microbiologically confirmed tuberculosis.



**Supplementary Table 4. Age at tuberculin skin test administration and the size of the skin test induration**

| Age at TST administration | 0mm<br>[n(%)] | 0-4 mm<br>[n(%)] | 5-9mm<br>[n(%)] | 10-14mm<br>[n(%)] | ≥15mm<br>[n(%)] | Row Total,<br>N |
|---------------------------|---------------|------------------|-----------------|-------------------|-----------------|-----------------|
| 6 months or below         | 361 (48.1)    | 153 (20.4)       | 97 (12.9)       | 104 (13.9)        | 35 (4.7)        | 750             |
| 7-12 months               | 222 (76.3)    | 24 (8.2)         | 20 (6.9)        | 14 (4.8)          | 11 (3.8)        | 291             |
| >12 months to 24 months   | 286 (85.6)    | 24 (7.2)         | 7 (2.1)         | 5 (1.5)           | 12 (3.6)        | 334             |
| >24 months                | 194 (91.9)    | 4 (1.9)          | 1 (0.5)         | 4 (1.9)           | 8 (3.8)         | 211             |

**Supplementary Table 5. Tuberculosis-related outcomes in children and maternal smoking during pregnancy, restricted to the TC Newman site‡.**

| Variable                             | Outcome Events | No. Participants | Child-years of observation | Incidence per 100 Child-years (95% CI) | Hazard Ratio (95% CI) | Adjusted Hazard Ratio (95% CI) |
|--------------------------------------|----------------|------------------|----------------------------|----------------------------------------|-----------------------|--------------------------------|
| <b><u>Tuberculin Conversion</u></b>  |                |                  |                            |                                        |                       |                                |
| All participants                     | 76             | 420              | 566.2                      | 13.4 (10.7, 16.8)                      | –                     | –                              |
| Maternal smoking during pregnancy†   |                |                  |                            |                                        |                       |                                |
| No                                   | 37             | 222              | 303.7                      | 12.2 (8.8, 16.8)                       | 1 (Referent)          | 1 (Referent)                   |
| Yes                                  | 38             | 195              | 259.3                      | 14.7 (10.7, 20.1)                      | 1.20 (0.76, 1.88)     | 1.16 (0.74, 1.83)              |
| <b><u>Diagnosed Tuberculosis</u></b> |                |                  |                            |                                        |                       |                                |
| All participants                     | 55             | 420              | 1273.8                     | 4.3 (3.3, 5.6)                         | –                     | –                              |
| Maternal smoking during pregnancy†   |                |                  |                            |                                        |                       |                                |
| No                                   | 23             | 222              | 704.3                      | 3.3 (2.2, 4.9)                         | 1 (Referent)          | 1 (Referent)                   |
| Yes                                  | 31             | 195              | 561.9                      | 5.5 (3.9, 7.8)                         | 1.64 (0.95, 2.81)     | 1.66 (0.96, 2.86)              |

† This refers to self-reported smoking status at the baseline study visit. Self-reported smoking was highly correlated with maternal and infant urine cotinine levels.

‡ The multivariable model for tuberculosis conversion was adjusted for male sex, maternal smoking during pregnancy, the number of children <5 years old in the household, and the age at which the first tuberculin skin test was performed. The multivariable model for diagnosed tuberculosis was adjusted for male sex, isoniazid preventive therapy, tuberculin skin test conversion, a lower respiratory tract infection, and maternal smoking during pregnancy.

**Supplementary Table 6. Table. Test of proportional hazards assumption for variables included in Cox Models of outcomes of tuberculin skin test conversion and diagnosed tuberculosis.**

| Variable                             | Proportional hazards assumption |                           |
|--------------------------------------|---------------------------------|---------------------------|
|                                      | Tuberculin skin test conversion | Diagnosed Tuberculosis    |
| <b>Child characteristics</b>         |                                 |                           |
| Sex                                  | Not violated                    | Not violated              |
| Birthweight, kilograms               | Not violated                    | Not violated              |
| Gestational age, weeks               | Not violated                    | Not violated              |
| Lower respiratory tract infection    | Not violated                    | Not violated              |
| HIV-positive                         | Not violated                    | Not violated              |
| Weight for age Z-score               | Not violated                    | Not violated              |
| Breastfeeding                        | Not violated                    | Not violated              |
| Isoniazid Preventive Therapy         | Not violated                    | Not violated              |
| <b>Maternal characteristics</b>      |                                 |                           |
| Age, years                           | Not violated                    | Not violated              |
| TB treatment in pregnancy            | Not violated                    | Not violated              |
| Prior TB diagnosis                   | Not violated                    | Not violated              |
| Maternal smoking during pregnancy    | Not violated                    | Not violated              |
| Maternal education                   | Not violated                    | Not violated              |
| <b>Household Characteristics</b>     |                                 |                           |
| Socioeconomic status, quartile       | 1 strata violated, P=0.03       | 1 strata violated, P=0.04 |
| Clinic                               | Not violated                    | Not violated              |
| Household income, rand per month     | Not violated                    | Not violated              |
| Crowding, persons per household      | Not violated                    | 1 strata violated, P=0.03 |
| Children under 5 yo per household    | Not violated                    | Not violated              |
| TB patient in household in past year | Not violated                    | Not violated              |

**Supplementary Table 7. Infant and maternal clinical characteristics of children with HIV-infection and diagnosed with tuberculosis meningitis included in the study.**

| Infant | Infant HIV-status | Diagnosed tuberculosis, type | Maternal HIV-status | TB patient in household in past year‡ | Preventive therapy given | Maternal TB treatment during pregnancy | Mother diagnosed with TB prior to pregnancy | Breastfed |
|--------|-------------------|------------------------------|---------------------|---------------------------------------|--------------------------|----------------------------------------|---------------------------------------------|-----------|
| 1      | Positive          | Yes, Pulmonary               | Positive            | No                                    | No                       | No                                     | No                                          | Yes       |
| 2      | Positive          | No                           | Positive            | No                                    | No                       | No                                     | No                                          | Yes       |
| 3      | Negative          | Yes, Meningitis              | Positive            | Yes                                   | No                       | Yes                                    | No                                          | Yes       |

Abbreviations. TB, tuberculosis.

‡ Household tuberculosis exposure in the year before the primary study visit

**Supplementary Figure 1. Distribution of tuberculin skin test induration reactions from the first test taken from 915 children in the Drakenstein Child Health Study†**

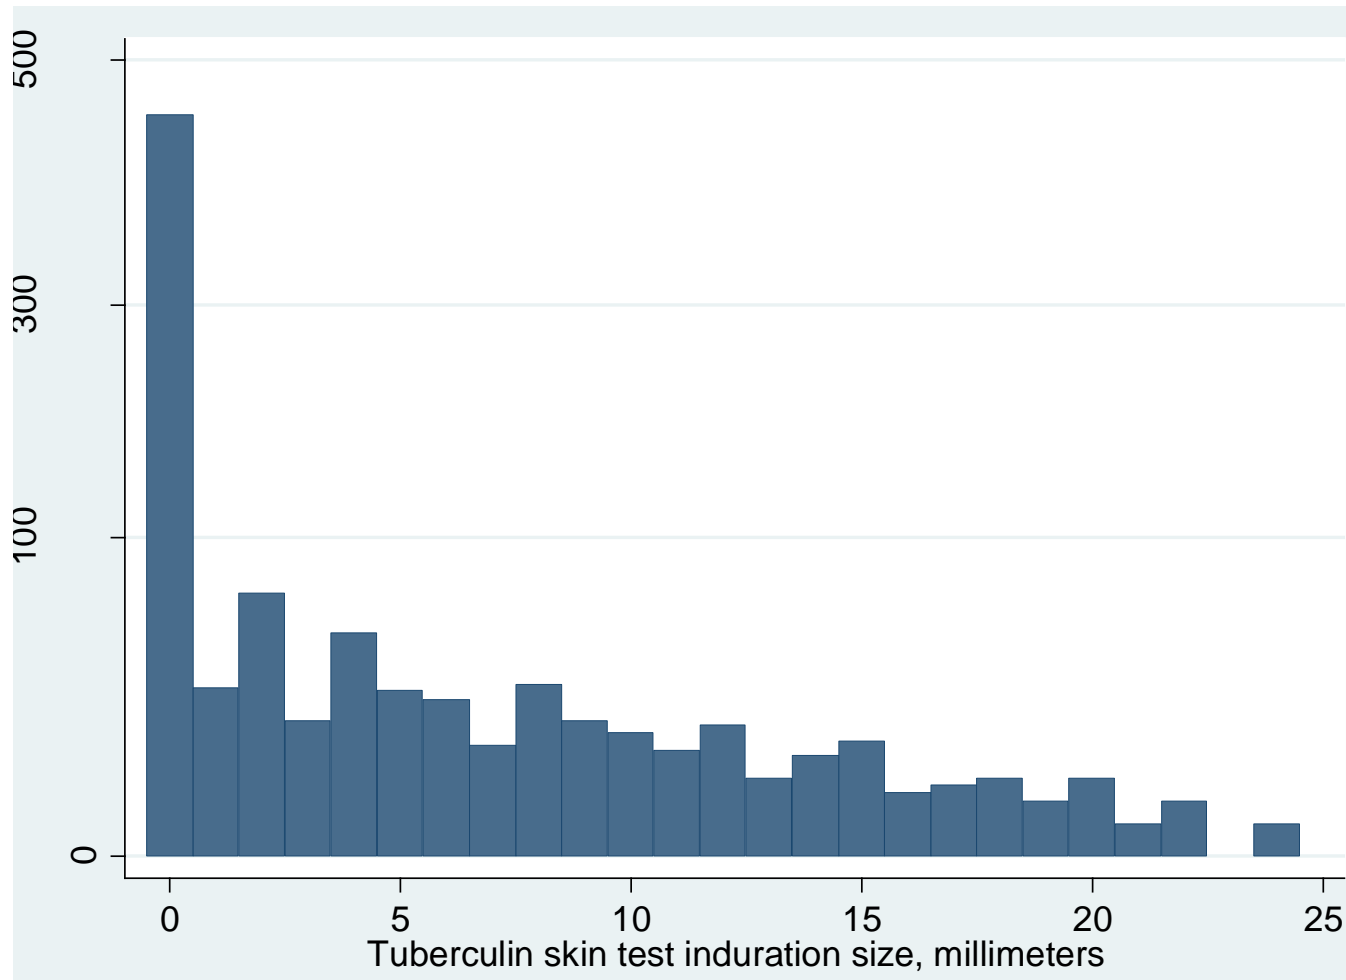

† The y-axis is set on a square root scale due to the large number of participants with null induration reactions. Therefore, the spaces amongst the y-axis may not be proportionate. A tuberculin skin test conversion was defined as a skin test induration of 10 millimeters or greater.

Supplementary Figure 2. Cumulative hazards curves for (A) tuberculin skin test conversion, (B) diagnosed tuberculosis disease, (C), microbiologically or radiographically diagnosed tuberculosis, and (D) microbiologically-confirmed tuberculosis only, Drakenstein Birth Cohort Study.

(A)

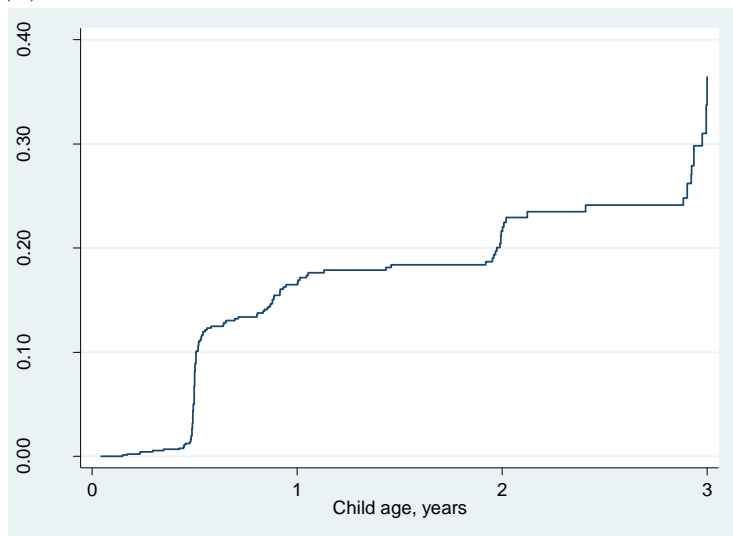

(B)

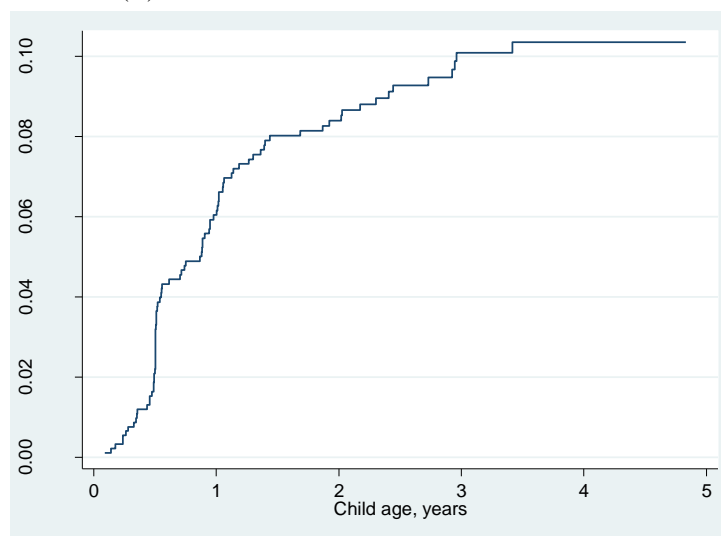

(C)

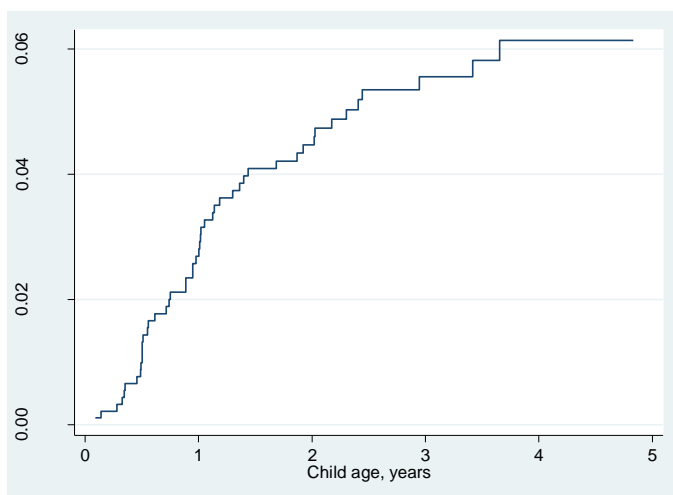

(D)

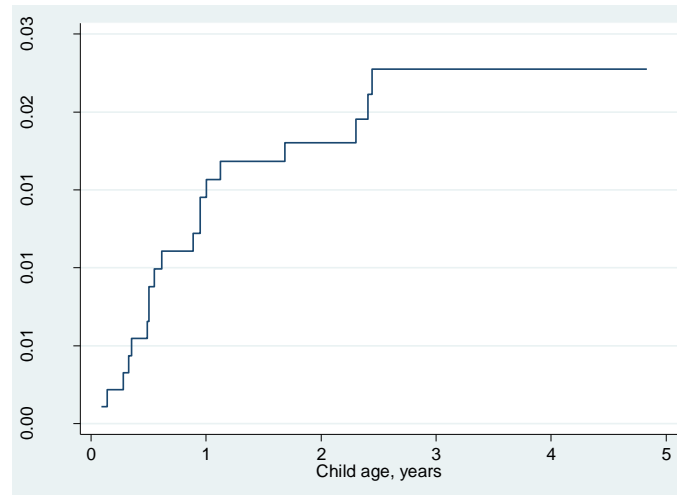

**Supplementary Figure 3. Difference in days between lower respiratory tract infection and tuberculosis diagnoses among 55 children with both diagnoses.**

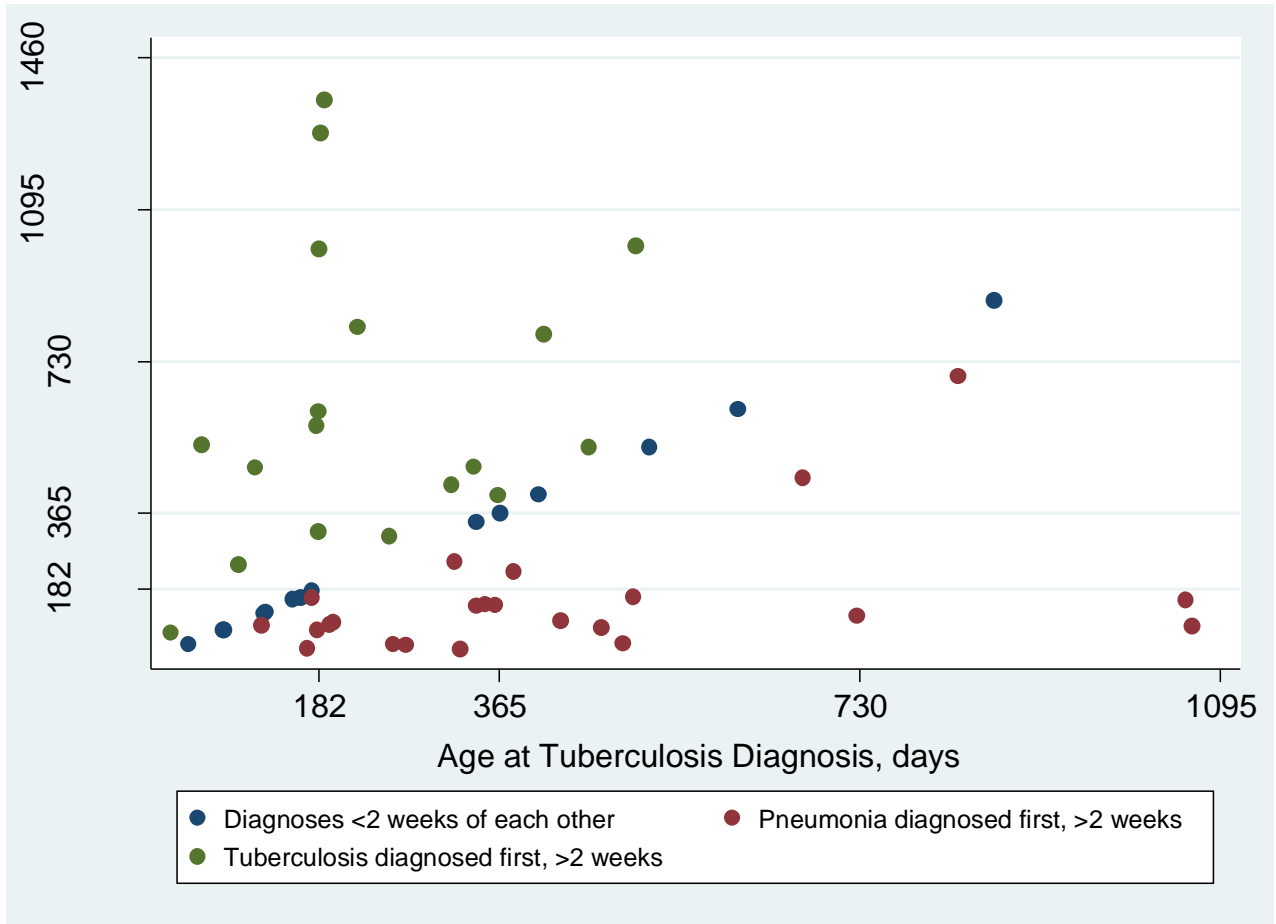

**Supplementary Figure 4. Difference in days† between lower respiratory tract infection and tuberculosis diagnoses in pediatric tuberculosis cases diagnosed microbiologically-confirmed**

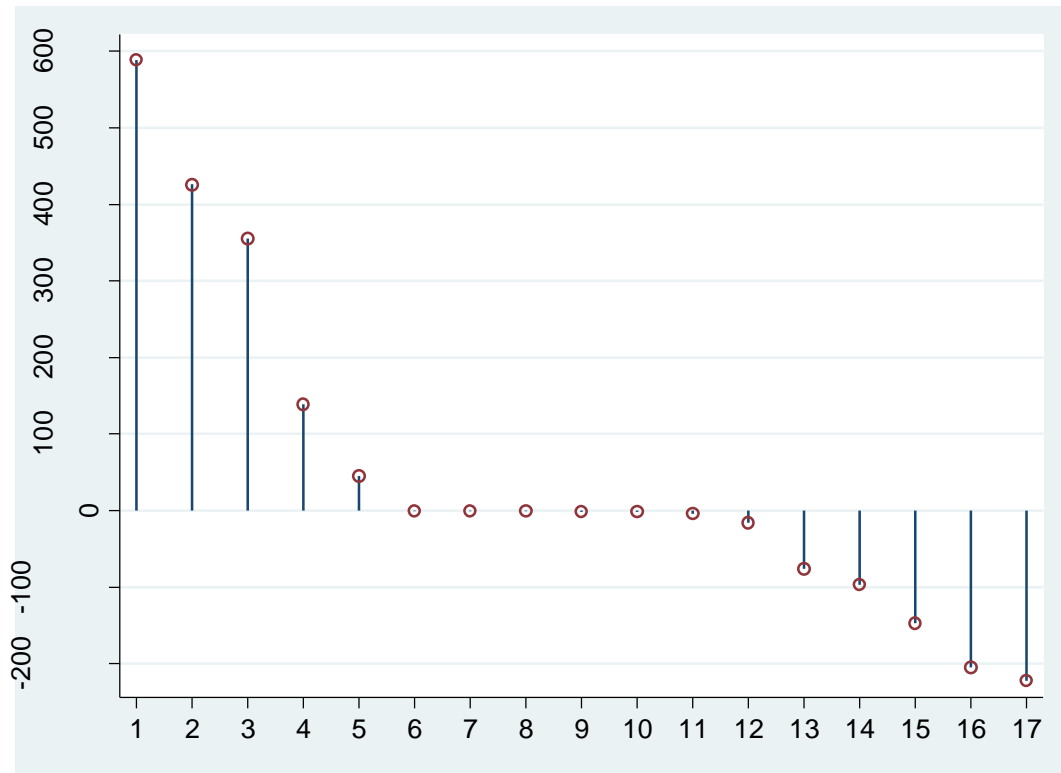

† Positive numbers on the y-axis indicate the tuberculosis diagnosis occurred before the lower respiratory tract infection. Negative numbers on the y-axis indicate the lower respiratory tract infection occurred before the tuberculosis diagnosis. Cases with circles at 0 days indicates both diagnosis occurred at the same time. The lower respiratory tract infection and tuberculosis disease were diagnosed more than two weeks apart from each other in 11 of 17 (64.7%) microbiologically-confirmed cases that also were diagnosed with a lower respiratory tract infection.

**Supplementary Figure 5. Difference in days† between lower respiratory tract infection and tuberculosis diagnoses in pediatric tuberculosis cases diagnosed either radiographically or microbiologically.**

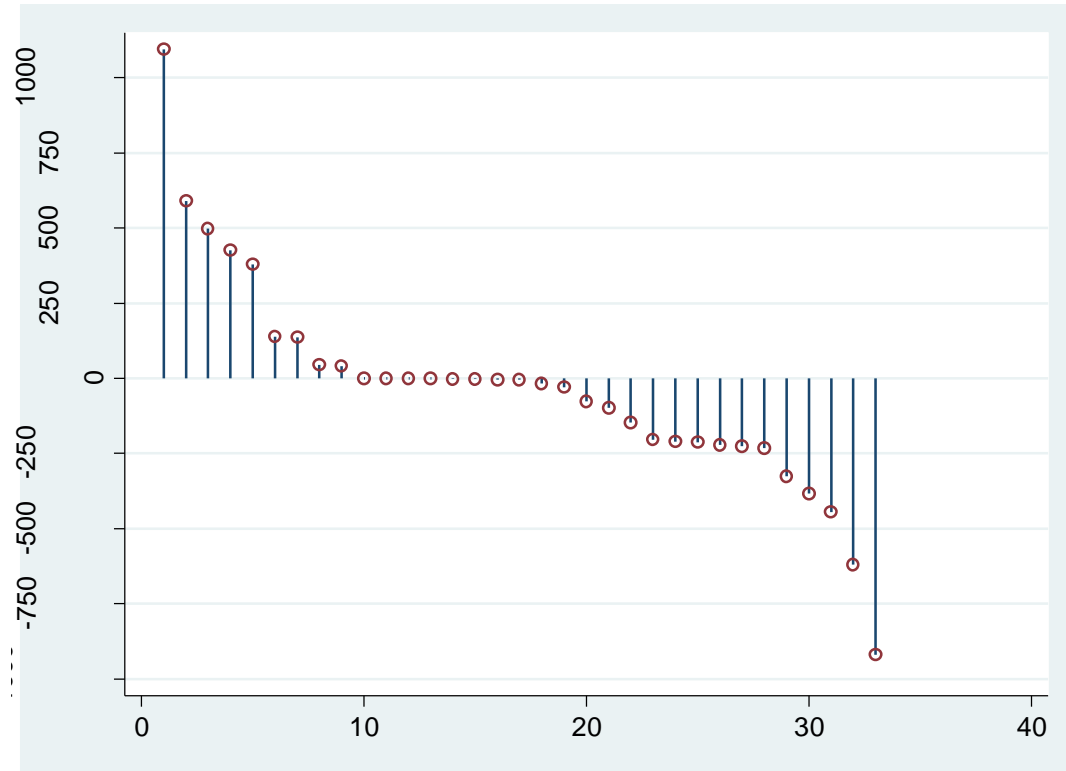

† Each vertical line represents a single child with both lower respiratory tract infection and a tuberculosis diagnoses and the y-axis gives a unique ID number for each child. Positive numbers on the y-axis indicate the tuberculosis diagnosis occurred before the lower respiratory tract infection. Negative numbers indicate the lower respiratory tract infection occurred before the tuberculosis diagnosis. Cases with circles at 0 days indicates both diagnosis occurred at the same time. The lower respiratory tract infection and tuberculosis disease were diagnosed more than two weeks apart from each other in 26 of 34 (76.5%) radiographically suggestive or microbiologically-confirmed cases that also were diagnosed with a lower respiratory tract infection.



**Supplementary Figure 6. Difference in days† between lower respiratory tract infection and tuberculosis diagnoses in all diagnosed tuberculosis cases**

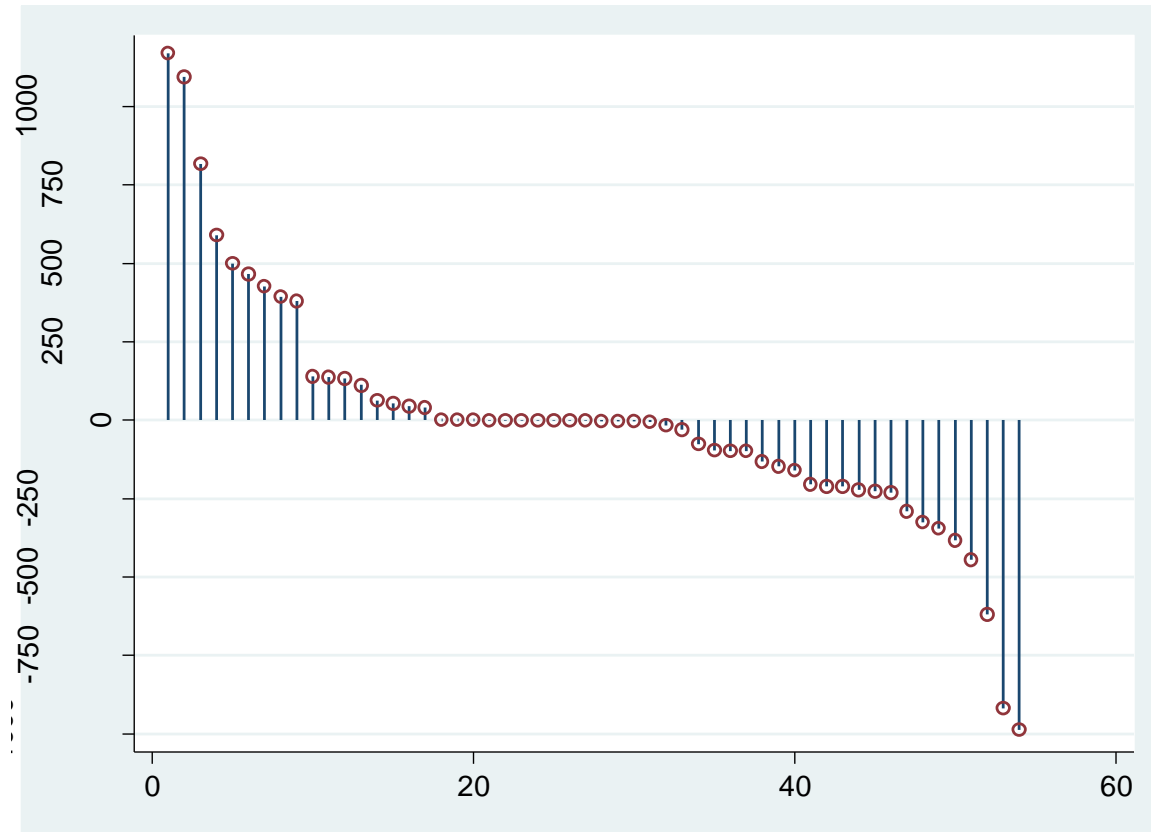

† Each vertical line represents a single child with both lower respiratory tract infection and a tuberculosis diagnoses and the y-axis gives a unique ID number for each child. Positive numbers on the y-axis indicate the tuberculosis diagnosis occurred before the lower respiratory tract infection. Negative numbers on the y-axis indicate the lower respiratory tract infection occurred before the tuberculosis diagnosis. Cases with circles at 0 days indicates both diagnosis occurred at the same time. The lower respiratory tract infection and tuberculosis disease were diagnosed more than two weeks apart from each other in 41 of 55 (74.5%) of all diagnosed tuberculosis cases (clinically, radiographically, or microbiologically diagnosed disease) that also were diagnosed with a lower respiratory tract infection.
